# Supplementary material for: Breastfeeding Support among Healthcare Workers in Nigeria
Source: Research Square preprint supplement (doi:10.21203/rs.3.rs-3446704/v1), 2023-10-23
Supplement: Supplementary file 1 [file b5f50c0dfc7ae9d9744c9fc7.docx]

**Table S1: Summary of knowledge, attitude and practice on breastfeeding support amongst healthcare workers**

| **Variable** | **Categories** | **n** | **%** |
| --- | --- | --- | --- |
| **Knowledge of breastfeeding (technique)** | Optimal | 1001 | 77.4 |
| Suboptimal | 293 | 22.6 |
|  |  |  |  |
| **Knowledge of breastfeeding (support)** | Optimal | 777 | 60 |
| Suboptimal | 517 | 40 |
|  |  |  |  |
| **Knowledge of breastfeeding (general)** | Optimal | 851 | 65.8 |
| Suboptimal | 443 | 34.2 |
|  |  |  |  |
| **HCW attitude towards breastfeeding** | Positive | 391 | 30.2 |
| Negative | 903 | 69.8 |
|  |  |  |  |
| **Instructional materials support for breastfeeding** | Optimal | 850 | 65.7 |
| Suboptimal | 444 | 34.3 |
